# Supplementary material for: Free fatty acids, glicentin and glucose-dependent insulinotropic polypeptide as potential major determinants of fasting substrate oxidation
Source: PubMed Central journal article supplement (PMC8371005; doi:10.1038/s41598-021-95750-9), 2021-08-17
Supplement: 41598_2021_95750_MOESM1_ESM.pdf [file 41598_2021_95750_MOESM1_ESM.pdf]

## Supplementary material

### Free fatty acids, glicentin and glucose-dependent insulinotropic polypeptide as potential major determinants of fasting substrate oxidation

Julia Hummel<sup>1,2</sup>, Louise Fritsche<sup>1,2</sup>, Andreas Vosseler<sup>1-3</sup>, Corinna Dannecker<sup>1,2</sup>,  
Miriam Hoene<sup>4</sup>, Konstantinos Kantartzis<sup>1-3</sup>, Hans-Ulrich Häring<sup>1-3</sup>, Norbert Stefan<sup>1-3</sup>,  
Jürgen Machann<sup>1,2,5</sup>, Andreas L. Birkenfeld<sup>1-3</sup>, Cora Weigert<sup>1,2,4</sup>, Robert Wagner<sup>1-3</sup>,  
Andreas Peter<sup>1,2,4</sup>, Andreas Fritsche<sup>1-3</sup>, Martin Heni<sup>1-4</sup>

1. Institute for Diabetes Research and Metabolic Diseases of the Helmholtz Center  
1. Munich at the University of Tübingen, Otfried-Müller-Str. 10, 72076 Tübingen, Germany
2. German Center for Diabetes Research (DZD), Ingolstädter Landstraße 1, 85764  
Neuherberg, Germany
3. Department of Internal Medicine, Division of Diabetology, Endocrinology and  
Nephrology, Eberhard Karls University Tübingen, Otfried-Müller-Str. 10, 72076  
Tübingen, Germany
4. Institute for Clinical Chemistry and Pathobiochemistry, Department for Diagnostic  
Laboratory Medicine, Eberhard Karls University Tübingen, Hoppe-Seyler-Str. 3, 72076  
Tübingen, Germany
5. Department of Radiology, Section on Experimental Radiology, Eberhard Karls  
University Tübingen, Hoppe-Seyler-Str. 3, 72076 Tübingen, Germany

**Supplementary table 1: Associations with respiratory quotient (RQ) stratified by weight group.**

| N = 192                                              | Lean/Overweight (BMI < 30 kg/m <sup>2</sup> )<br>N=95 |                           |                              | Obese (BMI ≥ 30 kg/m <sup>2</sup> )<br>N=97 |                                 |                              | P <sub>interaction</sub> |
|------------------------------------------------------|-------------------------------------------------------|---------------------------|------------------------------|---------------------------------------------|---------------------------------|------------------------------|--------------------------|
|                                                      | Median (IQR) / n                                      | p value<br>(unadj./adj.*) | Stand. β<br>(standard error) | Median (IQR) / n                            | p value<br>(unadj./adj.*)       | Stand. β<br>(standard error) |                          |
| Sex                                                  |                                                       | 0.2 / 0.5 <sup>#</sup>    | -0.078 (0.012)               |                                             | 0.1 / 0.06 <sup>#</sup>         | -0.191 (0.010)               | 0.9                      |
| Male                                                 | 65                                                    |                           |                              | 62                                          |                                 |                              |                          |
| Female                                               | 30                                                    |                           |                              | 35                                          |                                 |                              |                          |
| Age (years)                                          | 31 (23 - 61)                                          | 0.1 / 0.4 <sup>##</sup>   | -0.113 (0.022)               | 54 (44 - 62)                                | <b>0.03 / 0.02<sup>##</sup></b> | -0.245 (0.031)               | 0.3                      |
| Body mass index (kg/m <sup>2</sup> )                 | 24.6 (21.9 - 27.8)                                    | 0.7 / 0.3                 | 0.141 (0.099)                | 33.6 (32.0 - 37.9)                          | 0.6 / 0.7                       | 0.042 (0.077)                | 0.5                      |
| <i>Blood pressure</i>                                |                                                       |                           |                              |                                             |                                 |                              |                          |
| Systolic (mmHg)                                      | 132 (125 – 142) <sup>a</sup>                          | 0.2 / 0.1                 | 0.173 (0.101)                | 140 (133 – 148)                             | 0.07 / 0.1                      | -0.178 (0.087)               | <b>0.03</b>              |
| Diastolic (mmHg)                                     | 84 (77 – 90) <sup>a</sup>                             | 1.0 / 0.6                 | 0.064 (0.001)                | 91 (85 – 100)                               | 0.5 / 0.9                       | -0.016 (0.001)               | 0.6                      |
| Heart rate (bpm)                                     | 66 (61 – 75) <sup>a</sup>                             | 0.2 / 0.2                 | -0.152 (0.059)               | 72 (65 – 81)                                | 0.7 / 0.7                       | 0.039 (0.060)                | 0.2                      |
| Metabolic syndrome                                   |                                                       | 1.0 / 0.4                 | -0.096 (0.013)               |                                             | 0.7 / 0.7                       | 0.038 (0.010)                | 0.8                      |
| Yes                                                  | 19 <sup>a</sup>                                       |                           |                              | 68 <sup>b</sup>                             |                                 |                              |                          |
| No                                                   | 74 <sup>a</sup>                                       |                           |                              | 26 <sup>b</sup>                             |                                 |                              |                          |
| <i>Glycemic category</i>                             |                                                       |                           |                              |                                             |                                 |                              |                          |
|                                                      |                                                       | 0.7 / 0.2                 |                              |                                             | 0.1 / 0.2                       |                              | 0.2                      |
| Normal glucose tolerance                             | 66                                                    |                           |                              | 41                                          |                                 |                              |                          |
| Prediabetes                                          | 28                                                    |                           |                              | 47                                          |                                 |                              |                          |
| Diabetes mellitus (newly diagnosed, treatment naïve) | 1                                                     |                           |                              | 9                                           |                                 |                              |                          |
| <b>Indirect calorimetry</b>                          |                                                       |                           |                              |                                             |                                 |                              |                          |
| Fasting respiratory quotient                         | 0.85 (0.79 – 0.90)                                    |                           |                              | 0.85 (0.80 – 0.90)                          |                                 |                              |                          |
| Resting energy expenditure (kcal)                    | 1925 (1649 – 2211)                                    | 0.3 / 1.0                 | -0.004 (0.073)               | 2108 (1839 – 2454) <sup>c</sup>             | 0.9 / <b>0.03</b>               | -0.310 (0.071)               | 0.4                      |

|                                                             |                                                           |                     |                |                                                         |                              |                |     |
|-------------------------------------------------------------|-----------------------------------------------------------|---------------------|----------------|---------------------------------------------------------|------------------------------|----------------|-----|
| <b>Body composition</b>                                     |                                                           |                     |                |                                                         |                              |                |     |
| Total adipose tissue, MR-derived (l)                        | 23.6 (16.4 – 30.9) <sup>d</sup>                           | 0.8 / 0.9           | -0.040 (0.058) | 44.5 (41.1 – 55.7) <sup>e</sup>                         | 0.8 / 0.8                    | 0.027 (0.046)  | 0.7 |
| Subcutaneous adipose tissue lower extremity, MR-derived (l) | 9.2 (7.5 – 12.8) <sup>d</sup>                             | 0.9 / 0.9           | 0.025 (0.057)  | 16.9 (14.1 – 20.1) <sup>e</sup>                         | 0.9 / 1.0                    | -0.000 (0.040) | 0.9 |
| Visceral adipose tissue, MR-derived (l)                     | 2.1 (1.5 – 3.5) <sup>f</sup>                              | 0.95 / 0.8          | 0.049 (0.031)  | 5.1 (4.2 – 7.4) <sup>e</sup>                            | 0.7 / 1.0                    | -0.003 (0.034) | 0.8 |
| Intrahepatic fat, MRS-derived (%)                           | 1.4 (0.8 – 3.1) <sup>g</sup>                              | 0.6 / 0.6           | 0.075 (0.013)  | 7.1 (3.4 – 14.2) <sup>h</sup>                           | 0.9 / 0.8                    | -0.023 (0.011) | 0.7 |
| <b>Glycemia</b>                                             |                                                           |                     |                |                                                         |                              |                |     |
| HbA1c (mmol/mol) /<br>HbA1c (%)                             | 36 (33 – 38) <sup>i</sup><br>5.4 (5.2 – 5.7) <sup>i</sup> | 0.9 / 0.2           | 0.160 (0.190)  | 39 (36 – 42) <sup>j</sup><br>5.7 (5.4 – 6) <sup>j</sup> | 0.7 / 1.0                    | -0.000 (0.131) | 0.8 |
| Fasting glucose (mmol/l)                                    | 5.1 (4.7 – 5.5) <sup>b</sup>                              | 0.8 / 0.3           | 0.137 (0.093)  | 5.6 (5.1 – 6.2) <sup>k</sup>                            | <b>0.04 / 0.04</b>           | -0.124 (0.072) | 0.1 |
| Fasting insulin (pmol/l)                                    | 53 (36 – 70) <sup>b</sup>                                 | 0.8 / 0.5           | 0.082 (0.019)  | 99 (70 – 144) <sup>k</sup>                              | 0.4 / 0.7                    | 0.043 (0.017)  | 0.7 |
| Fasting C-peptide (pmol/l)                                  | 394 (270 – 573) <sup>a</sup>                              | 0.5 / 0.1           | 0.185 (0.024)  | 666 (501 – 853) <sup>j</sup>                            | 0.9 / 0.8                    | -0.025 (0.026) | 0.6 |
| Disposition index                                           | 1751 (953 – 2735) <sup>j</sup>                            | 0.6 / 0.8           | -0.026 (0.014) | 1001 (579 – 1470) <sup>l</sup>                          | 0.09 / 0.2                   | 0.146 (0.012)  | 0.4 |
| Insulin sensitivity index (OGTT-derived)                    | 14.4 (10.2 – 19.2) <sup>m</sup>                           | 0.8 / 0.3           | -0.130 (0.021) | 6.3 (4.4 – 9.2) <sup>n</sup>                            | 0.7 / 0.9                    | -0.012 (0.017) | 1.0 |
| Adipo-IR (mmol/l*pmol/l)                                    | 22.4 (14.5 – 39.5) <sup>a</sup>                           | 0.09 / 0.2          | -0.135 (0.014) | 49.9 (32.9 – 79.7) <sup>j</sup>                         | 0.3 / 0.3                    | -0.108 (0.014) | 0.7 |
| <b>Plasma lipids</b>                                        |                                                           |                     |                |                                                         |                              |                |     |
| Free fatty acids (μmol/l)                                   | 464 (319 – 654) <sup>a</sup>                              | <b>0.005 / 0.01</b> | -0.269 (0.020) | 511 (407 – 632) <sup>j</sup>                            | <b>&lt;0.001 / &lt;0.001</b> | -0.370 (0.028) | 0.1 |
| Triglycerides (mg/dl)                                       | 73 (54 – 88) <sup>o</sup>                                 | 0.9 / 0.6           | 0.051 (0.025)  | 108 (82 – 141) <sup>e</sup>                             | 0.6 / 0.7                    | 0.050 (0.022)  | 0.8 |
| Cholesterol (mg/dl)                                         | 172 (147 – 206) <sup>l</sup>                              | 0.6 / 0.5           | 0.104 (0.000)  | 210 (177 – 234) <sup>j</sup>                            | 0.9 / 0.7                    | 0.039 (0.000)  | 0.8 |
| LDL-Cholesterol (mg/dl)                                     | 104 (83 – 131) <sup>l</sup>                               | 0.7 / 0.6           | 0.062 (0.034)  | 141 (114 – 165) <sup>j</sup>                            | 0.4 / 0.7                    | -0.051 (0.043) | 0.6 |
| HDL-Cholesterol (mg/dl)                                     | 55 (44 – 67) <sup>l</sup>                                 | 0.7 / 0.7           | 0.039 (0.042)  | 49 (43 – 59) <sup>j</sup>                               | 0.5 / 0.1                    | 0.168 (0.045)  | 0.4 |

|                                    |                                 |           |                |                                  |            |                |     |
|------------------------------------|---------------------------------|-----------|----------------|----------------------------------|------------|----------------|-----|
| Lipoprotein (a) (mg/dl)            | 11 (6 – 42) <sup>l</sup>        | 0.4 / 0.4 | -0.096 (0.009) | 14 (7 – 32) <sup>j</sup>         | 0.5 / 0.5  | -0.067 (0.010) | 1.0 |
| <b>Others</b>                      |                                 |           |                |                                  |            |                |     |
| Thyroid-stimulating hormone (mU/l) | 2.0 (1.4 – 3.1) <sup>l</sup>    | 0.7 / 0.2 | -0.14 (0.016)  | 1.7 (1.1 – 2.4) <sup>j</sup>     | 0.1 / 0.2  | 0.137 (0.011)  | 0.2 |
| C-reactive protein (mg/dl)         | 0.04 (0.01 – 0.15) <sup>l</sup> | 0.6 / 0.2 | 0.141 (0.007)  | 0.26 (0.11 – 0.56) <sup>j</sup>  | 0.8 / 0.9  | 0.020 (0.008)  | 0.9 |
| Morning cortisol, serum (nmol/l)   | 413 (336 – 524) <sup>l</sup>    | 0.7 / 1.0 | 0.005 (0.027)  | 368 (277.8 – 488.8) <sup>j</sup> | 0.2 / 0.06 | -0.210 (0.026) | 0.2 |

\*Adjusted for sex and age; # adjusted for age; ## adjusted for sex. Standardized  $\beta$  are from multivariate linear regression models. a: n=93; b: n =94; c: n=96; d: n=57; e: n=80, f: n=59; g: n=61; h: n=79; i: n=90; j: n=88; k: n=79; l: n=91; m: n=89; n: n=95; o: n= 71. MR: magnetic resonance; MRS: magnetic resonance spectroscopy; HbA1c: hemoglobin A1c; OGTT: oral glucose tolerance test; Adipo-IR: adipose tissue insulin resistance index; LDL-Cholesterol: low-density lipoprotein cholesterol; HDL-Cholesterol: high-density lipoprotein cholesterol.

## Supplementary figure 1

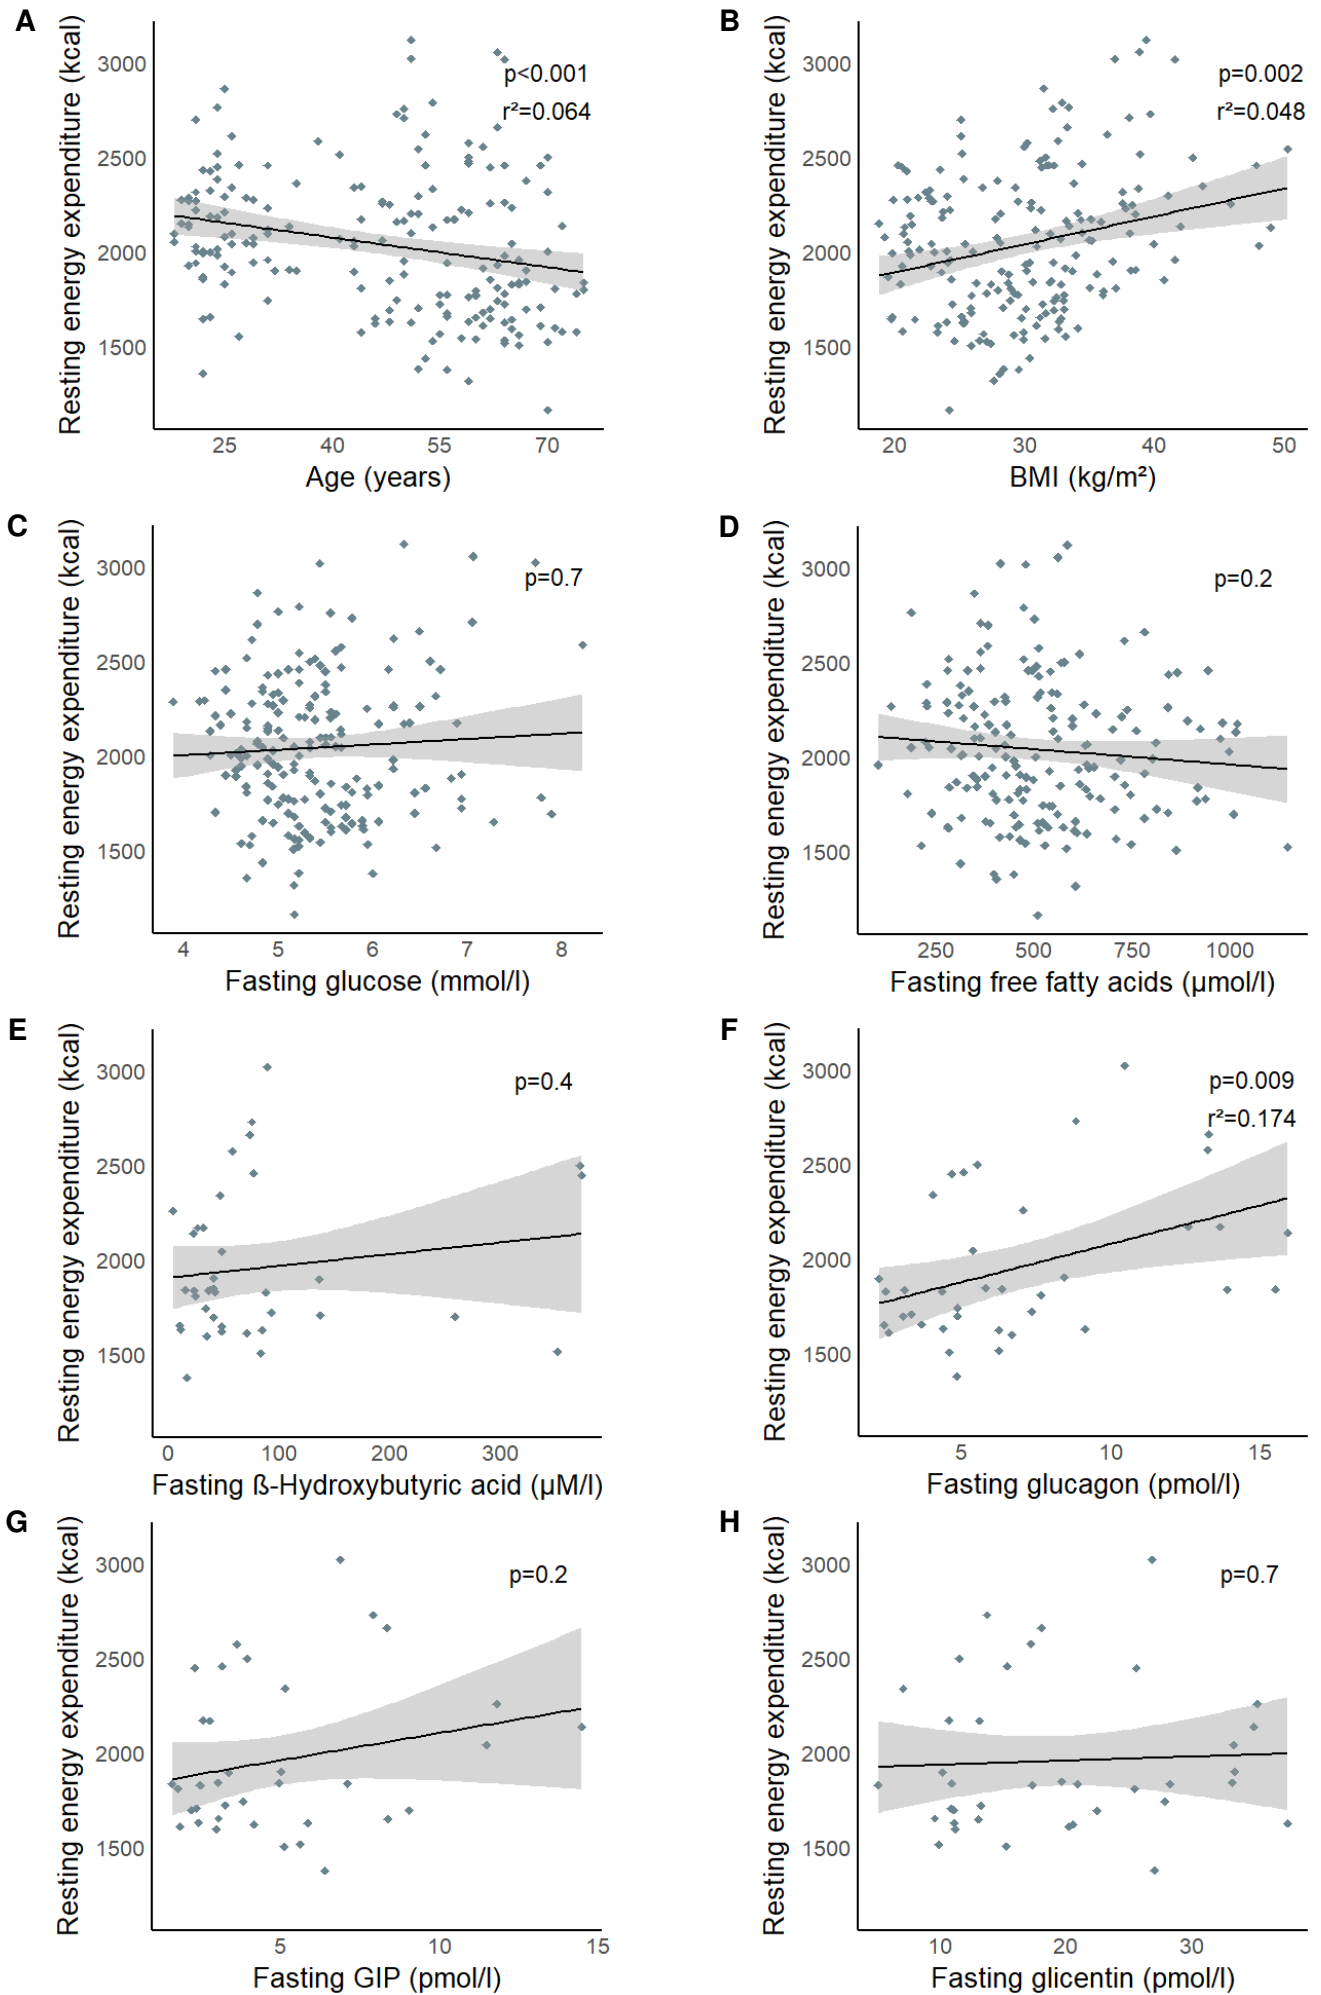

### **Supplementary figure 1 - Association resting energy expenditure and its' potential determinants**

Resting energy expenditure was negatively associated with age (**A**), with lower resting energy expenditure with increasing age. There was a positive association of resting energy expenditure and BMI (**B**). Resting energy expenditure was neither significantly correlated with plasma glucose (**C**) nor with free fatty acids (**D**) nor with the ketone body  $\beta$ -hydroxybutyric acid (**E**). While glucagon was positively associated with resting energy expenditure (**F**), this association was not independent of sex ( $p$  after adjustment for sex 0.7). Neither GIP (**G**) nor glicentin (**H**) were associated with resting energy expenditure. Data are presented as scatterplots with linear regression lines and 95% CI. P-values were taken from linear regression analyses.

**Supplementary table 2: Patient characteristics**

|                                          | Overall cohort<br>(n=192)                                 | Sub-group with<br>incretin<br>measurements<br>(n=38) |
|------------------------------------------|-----------------------------------------------------------|------------------------------------------------------|
|                                          | Median (IQR) / n                                          |                                                      |
| Sex                                      |                                                           |                                                      |
| Male                                     | 100                                                       | 16                                                   |
| Female                                   | 92                                                        | 22                                                   |
| Age (years)                              | 51 (27 – 62)                                              | 62 (56 – 66)                                         |
| Body mass index (kg/m <sup>2</sup> )     | 30.1 (24.7 – 33.7)                                        | 31.5 (28.7 – 33.3)                                   |
| Total adipose tissue, MR-derived (l)     | 37.9 (26.5 – 47.3) <sup>a</sup>                           | 39.8 (32.2 – 42.9)                                   |
| HbA1c (mmol/mol)/<br>HbA1c (%)           | 37 (34 – 40) <sup>b</sup><br>5.5 (5.3 – 5.8) <sup>b</sup> | 39 (37 – 41)<br>5.7 (5.5 – 5.9)                      |
| Fasting glucose (mmol/l)                 | 5.3 (4.9 – 5.8) <sup>c</sup>                              | 5.9 (5.6 – 6.5)                                      |
| Fasting insulin (pmol/l)                 | 70 (45 – 109) <sup>c</sup>                                | 91 (62 – 147)                                        |
| Insulin sensitivity index (OGTT-derived) | 9.6 (5.6 – 15.2) <sup>d</sup>                             | 5.9 (4.0 – 8.8)                                      |
| Free fatty acids (μmol/l)                | 498 (375 – 633) <sup>e</sup>                              | 519 (430 – 651)                                      |
| Triglycerides (mg/dl)                    | 97 (74 – 137) <sup>f</sup>                                | 98 (73 – 139) <sup>g</sup>                           |
| Fasting respiratory quotient             | 0.85 (0.79 – 0.90)                                        | 0.86 (0.80 – 0.92)                                   |

Data are presented as median (IQR); a: n=137; b: n =178; c: n=191; d: n=184; e: n=181; f: n=179; g: n=34. MR: magnetic resonance; HbA1c: hemoglobin A1c; OGTT: oral glucose tolerance test.
